# Supplementary material for: Thrombotic microangiopathy complicate with the severe sudden-onset liver ruptures in a pre-eclampsia patient after the caesarean section: a case report
Source: Research Square preprint supplement (doi:10.21203/rs.3.rs-8374429/v1), 2026-02-04
Supplement: Supplementary file 1 [file 8d3287108481de82d228f4cb.docx]

**Table 1.** Laboratory Data

| **Variable** | **Reference Range** | **5 Days before Current Presentation, before Caesarean Section** | **2 Days before Current Presentation, after Caesarean Section** | **On Current Presentation,**  **This Hospital** | **Day 1, after Blood Transfusion, This Hospital** | **Day 1, after Interventional Procedure, This Hospital** | **Day 2, after Exploratory Laparotomy, This Hospital** | **Day 3, This Hospital** | **Day 5, This Hospital** |
| --- | --- | --- | --- | --- | --- | --- | --- | --- | --- |
| Hemoglobin (g/dl) | 11.5-15.0 | 11.2 | 10.2 | 6.6 | 3.8 | 3.8 | 7.0 | 8.6 | 9.6 |
| White-cell count (per μl) | 3.5-9.50 | 8.50 | 8.20 | 12.08 | 11.46 | 3.85 | 2.18 | 17.74 | 30.98 |
| Platelet count (per μl) | 125-350 | 200 | 250 | 30 | 23 | 25 | 25 | 75 | 70 |
| Lactate dehydrogenase (U/liter) | 120-250 | 155 | 165 | 13802 | 16285 | 3673 | 811 | 1650 | 1236 |
| Alanine aminotransferase (U/liter) | 7-45 | 210 | 240 | 5736 | 1052 | 515 | 244 | 260 | 307 |
| Aspartate aminotransferase (U/liter) | 13-40 | 180 | 190 | 17161 | 18178 | 3208 | 685 | 643 | 392 |
| Total bilirubin (μmol/L) | 0-23 | 18.7 | 14.5 | 92.9 | 56.8 | 46.2 | 20.2 | 58.9 | 48.0 |
| Direct bilirubin (μmol/L) | 0-8 | 13.9 | 11.2 | 35.8 | 18.9 | 15.6 | 6.0 | 32.6 | 30.8 |
| Creatinine (μmol/L) | 41-73 | 50 | 50 | 251 | 269 | 261 | 216 | 281 | 252 |
| Partial thromboplastin time (sec) | 9.80-12.1 | 11.70 | 11.50 | 19.3 | 15.2 | 14.8 | 24.4 | 14.2 | 21.2 |
| Fibrinogen (g/L) | 1.8-3.5 | 3.50 | 3.20 | 1.67 | 1.38 | 1.76 | 0.72 | 1.8 | 1.32 |
| D‑dimer (mg/L) | 0-0.55 | 0.35 | 1.55 | 80.00 | 1.71 | 3.40 | 2.06 | 21.92 | 33.25 |
