# Supplementary material for: Thrombotic microangiopathy complicate with the severe sudden-onset liver ruptures in a pre-eclampsia patient after the caesarean section: a case report
Source: Research Square preprint supplement (doi:10.21203/rs.3.rs-8374429/v1), 2026-02-04
Supplement: Supplementary file 2 [file a47c385ff6fb197e89e250e9.docx]

**Table 2.** Laboratory Data of Immune System Function Evaluation

| Variation | | Reference Range | Day 3, This Hospital |
| --- | --- | --- | --- |
| IgG | | 8.6-17.4g/L | 1.49 |
| IgM | | 0.5-2.8g/L | 0.125 |
| C3 | | 0.7-1.4g/L | 0.096 |
| C4 | | 0.1-0.4g/L | 0.021 |
| Coombs Test | | negative | negative |
| Antinuclear Antibody Panel | Anti-dsDNA | <100IU/mL | <10.00 |
| Anti-Sm | <1IU/mL | 0.06 |
| Anti-SSB | <1IU/mL | 0.09 |
| Anti-Scl-70 | <1IU/mL | 0.09 |
| Anti-SSA | <1IU/mL | 0.04 |
|  | Anti-Jo-1 | <1IU/mL | 0.04 |
|  | Anti-RNP | <1IU/mL | 0.06 |
|  | Anti-Mi-2 | <1IU/mL | 0.22 |
|  | Anti-PM-Scl | <1IU/mL | 0.07 |
|  | Anti-Centromere | <1IU/mL | 0.04 |
| Antinuclear Antibody Type | | <1:40 | <1:40 |
| Anticardiolipin Antibody | | 0-20CU/ml | 32.70 |
| Anticyclic Citrullinated Peptide Antibody | | 0-20CU/ml | <4.60 |
| Complement-related Factors | CFI | 9.44-100.00ug/mL | 100.39 |
| CFB | 111.45-219.64ng/mL | 131.66 |
| CFH antibody | ≦27.00ng/mL | 5.79ng/mL |
|  | CFH | 116.00-562.00ug/mL | 779.69 |
| CH50 | | 23.0-46.0U/mL | 13.7 |
| C5B-9 | | 72-252ng/ml | 1642 |
| ADAMTS13-Act | | 70-120% | 42.44 |
| ADAMTS13-int-Q | | <0.6 | 0 |
| Complement Gene | CFI | Benign | Benign |
| CFB | Benign | Likely Benign |
| C1R | Benign | Benign |
| C3 | Benign | Benign |
| CFP | Benign | Benign |
